# Supplementary material for: Genetically-encoded discovery of proteolytically stable bicyclic inhibitors for morphogen NODAL
Source: Chem Sci. 2021 Jun 17;12(28):9694–703. doi: 10.1039/d1sc01916c (PMC8294009; doi:10.1039/d1sc01916c)
Supplement: SC-012-D1SC01916C-s004 [file SC-012-D1SC01916C-s004.xlsx]

## Sheet: Sheet1
	sm	Pr
0	2895.7	0
1	2087	62
7	1602	677
15	880	2388
30	492	3159.25
45	380	3224.7
60	230	3488.5
