# Supplementary material for: Genetically-encoded discovery of proteolytically stable bicyclic inhibitors for morphogen NODAL
Source: Chem Sci. 2021 Jun 17;12(28):9694–703. doi: 10.1039/d1sc01916c (PMC8294009; doi:10.1039/d1sc01916c)
Supplement: SC-012-D1SC01916C-s005 [file SC-012-D1SC01916C-s005.xlsx]

## Sheet: Sheet1
	sm	Pr
0	2014.9	0
1	1002	203.25
7	1218	619.5
15	863.6	2211.75
30	504.3	3002.85
45	342.2	3238.65
60	351.4	3602.2
