# Supplementary material for: Genetically-encoded discovery of proteolytically stable bicyclic inhibitors for morphogen NODAL
Source: Chem Sci. 2021 Jun 17;12(28):9694–703. doi: 10.1039/d1sc01916c (PMC8294009; doi:10.1039/d1sc01916c)
Supplement: SC-012-D1SC01916C-s006 [file SC-012-D1SC01916C-s006.xlsx]

## Sheet: Sheet1
	sm	Pr
0		0
1	2087	110
7	1602	514
15	1501	791
30	1251	1369
45	1083	1890
60	866.8	2235
