# Supplementary material for: Genetically-encoded discovery of proteolytically stable bicyclic inhibitors for morphogen NODAL
Source: Chem Sci. 2021 Jun 17;12(28):9694–703. doi: 10.1039/d1sc01916c (PMC8294009; doi:10.1039/d1sc01916c)
Supplement: SC-012-D1SC01916C-s007 [file SC-012-D1SC01916C-s007.xlsx]

## Sheet: Sheet1
	sm	Pr
0	2478.5	0
1	2036	86.6
7	1218	131
15	1653	347.6
30	1296.7	492.7
45	1133.4	542.3
60	1021.6	578.9
