# Supplementary material for: Genetically-encoded discovery of proteolytically stable bicyclic inhibitors for morphogen NODAL
Source: Chem Sci. 2021 Jun 17;12(28):9694–703. doi: 10.1039/d1sc01916c (PMC8294009; doi:10.1039/d1sc01916c)
Supplement: SC-012-D1SC01916C-s008 [file SC-012-D1SC01916C-s008.xlsx]

## Sheet: Sheet1
	sm	Pr
0	1573.3	0
1	1454.18	0
15	1188.9	0
30	1088.1	0
45	734	0
60	600	0
